# Supplementary figures and images for: Tumor invasive ability of papillary thyroid carcinomas is not conferred by acquired gene mutations
Source: HighWire-hosted journal article supplement (doi:10.1136/jim-2021-001971), 2021-07-07

**A**

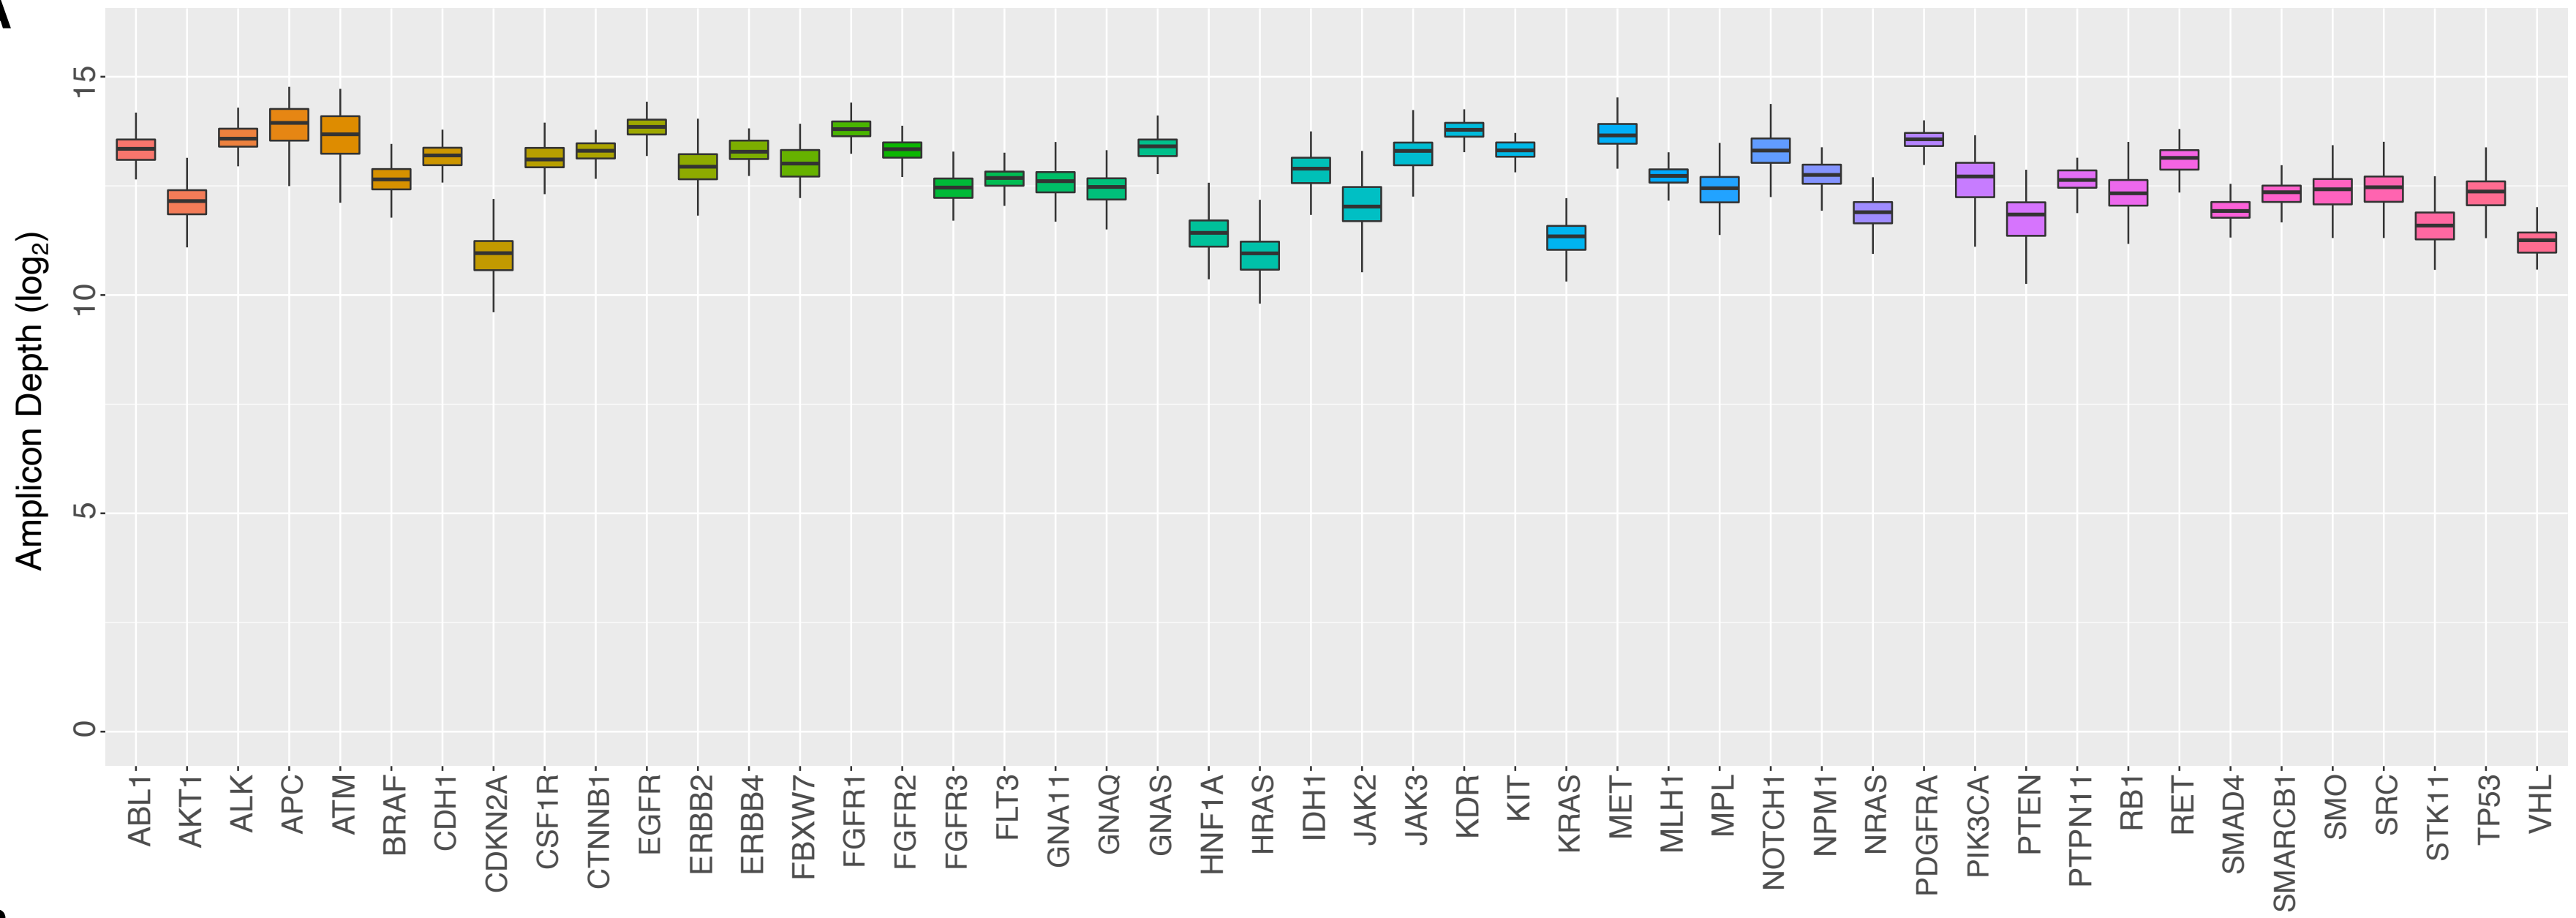

**B**

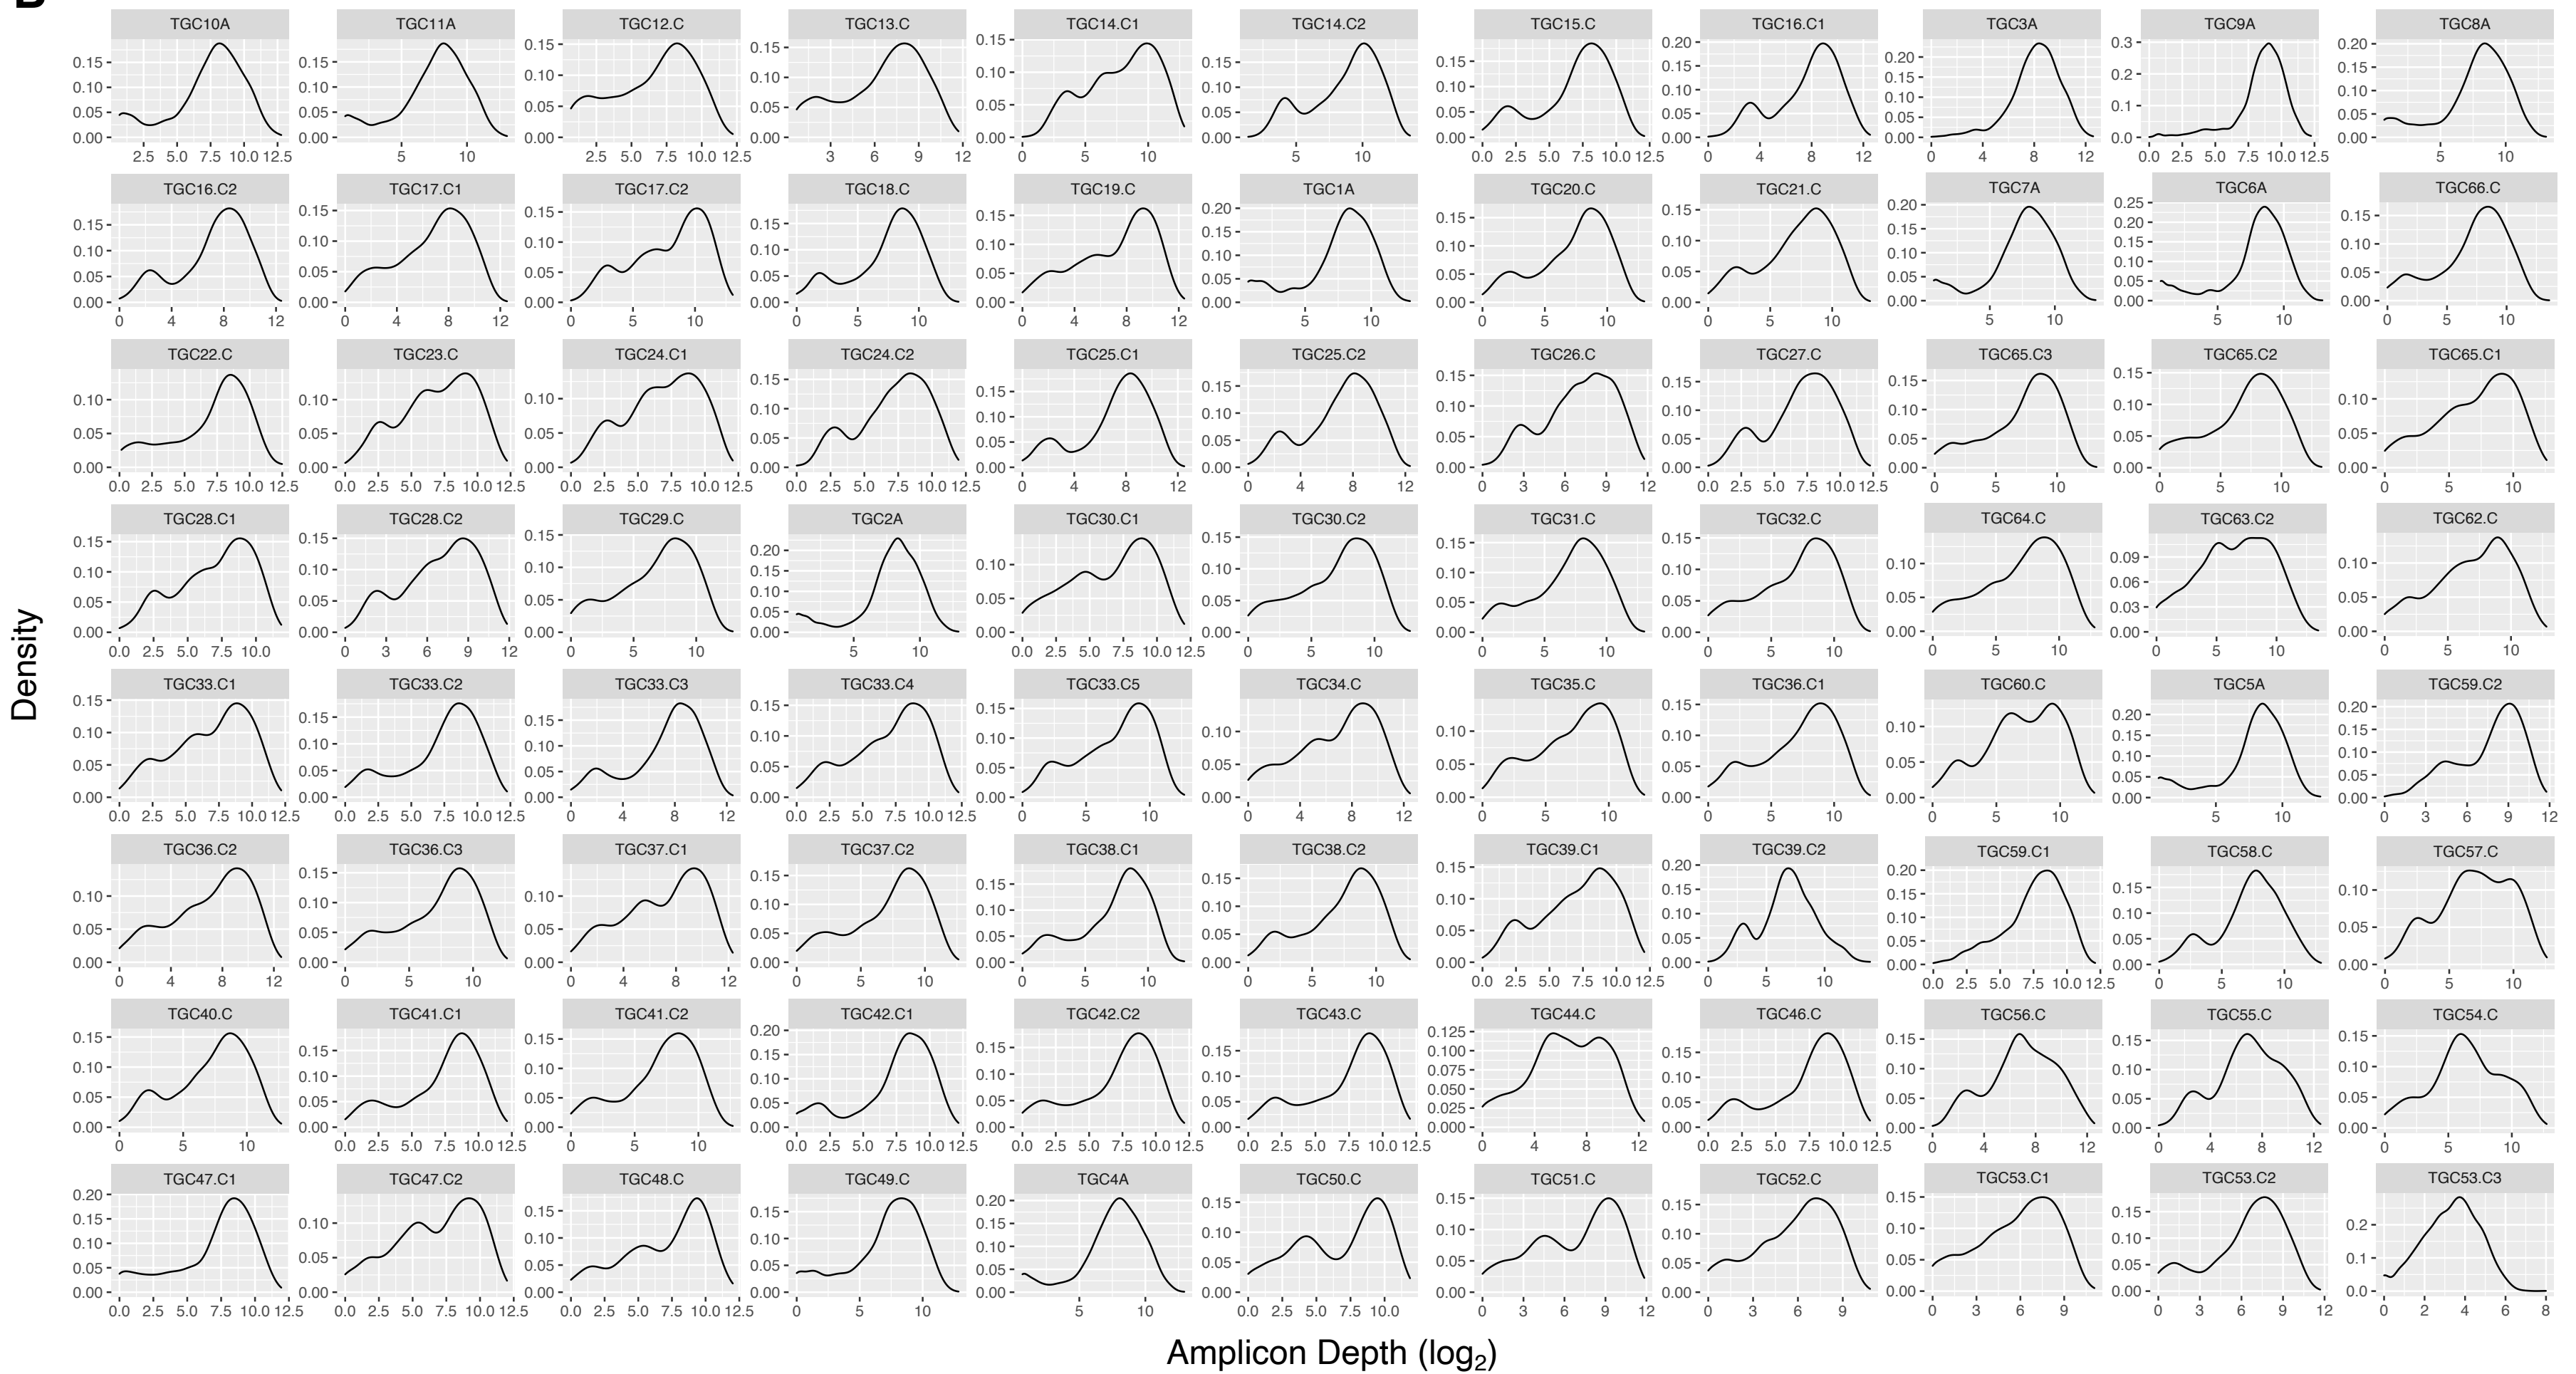

Supplement: jim-2021-001971supp002_data_supplement.pdf [file jim-2021-001971supp002_data_supplement.pdf]

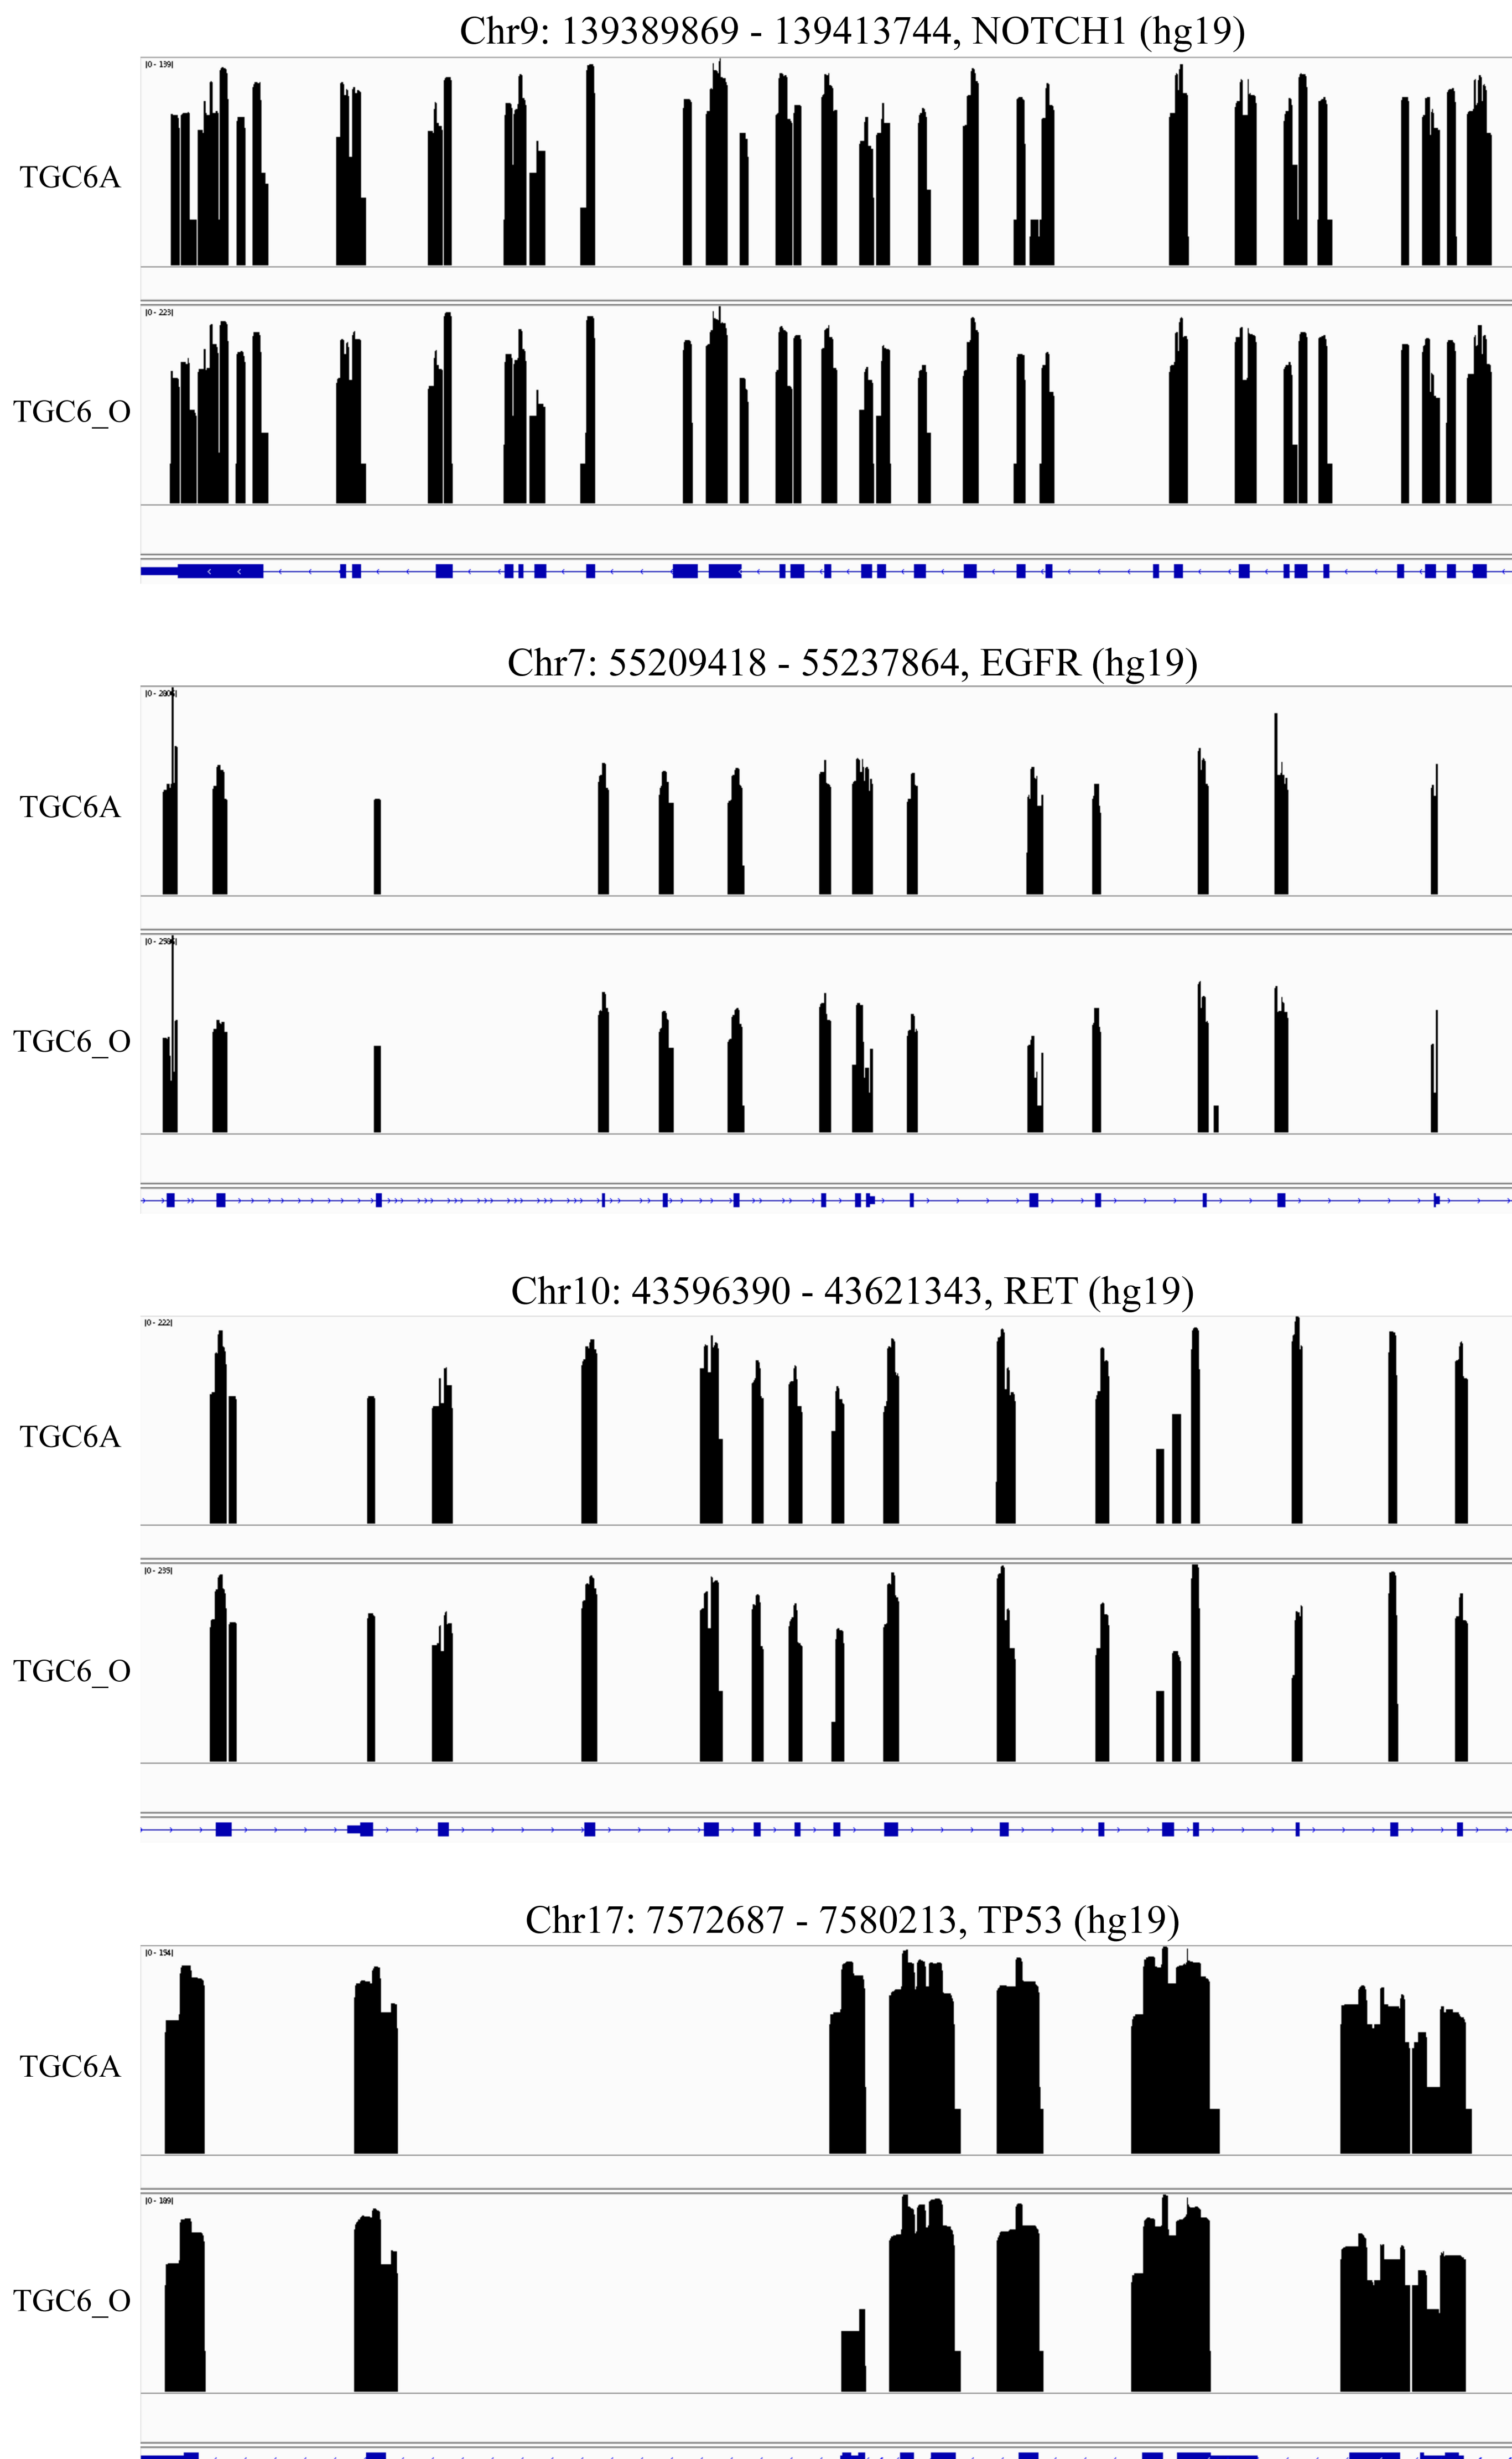

Supplement: jim-2021-001971supp003_data_supplement.pdf [file jim-2021-001971supp003_data_supplement.pdf]
